# Supplementary material for: Modeling Brittle Fracture in Epoxy Nanocomposites using Extended Finite Element and Cohesive Zone Surface Methods
Source: Preprints.org preprint supplement (doi:10.20944/preprints202109.0353.v1), 2021-09-21
Supplement: Supplementary file 1 [file supplementary]

# **Modelling Brittle Fracture of Epoxy Nanocomposites using Extended Finite Element and Cohesive Zone Surface Methods**

John J. S. Biswakarma<sup>1</sup>, Dario A. Cruz<sup>1</sup>, Erich D. Bain<sup>2</sup>, Joseph M. Dennis<sup>3</sup>, Jan W. Andzelm<sup>1,3</sup> and Steven R. Lustig<sup>1,3,\*</sup>

<sup>1</sup> Department of Chemical Engineering, Northeastern University, 360 Huntington Avenue, Boston, MA 02115, USA

<sup>2</sup> Engineering Systems, Inc. 10338 Miller Rd, Dallas, TX 75238, USA.

<sup>3</sup> Materials and Manufacturing Science Division, CCDC, U.S Army Research Laboratory, 4600 Deer Creek Loop. Aberdeen Proving Ground, MD 21005, USA

\* Correspondence: [s.lustig@northeastern.edu](mailto:s.lustig@northeastern.edu)

## **SUPPLEMENTARY INFORMATION**

## Supplementary Information 1: Uniaxial tensile test results

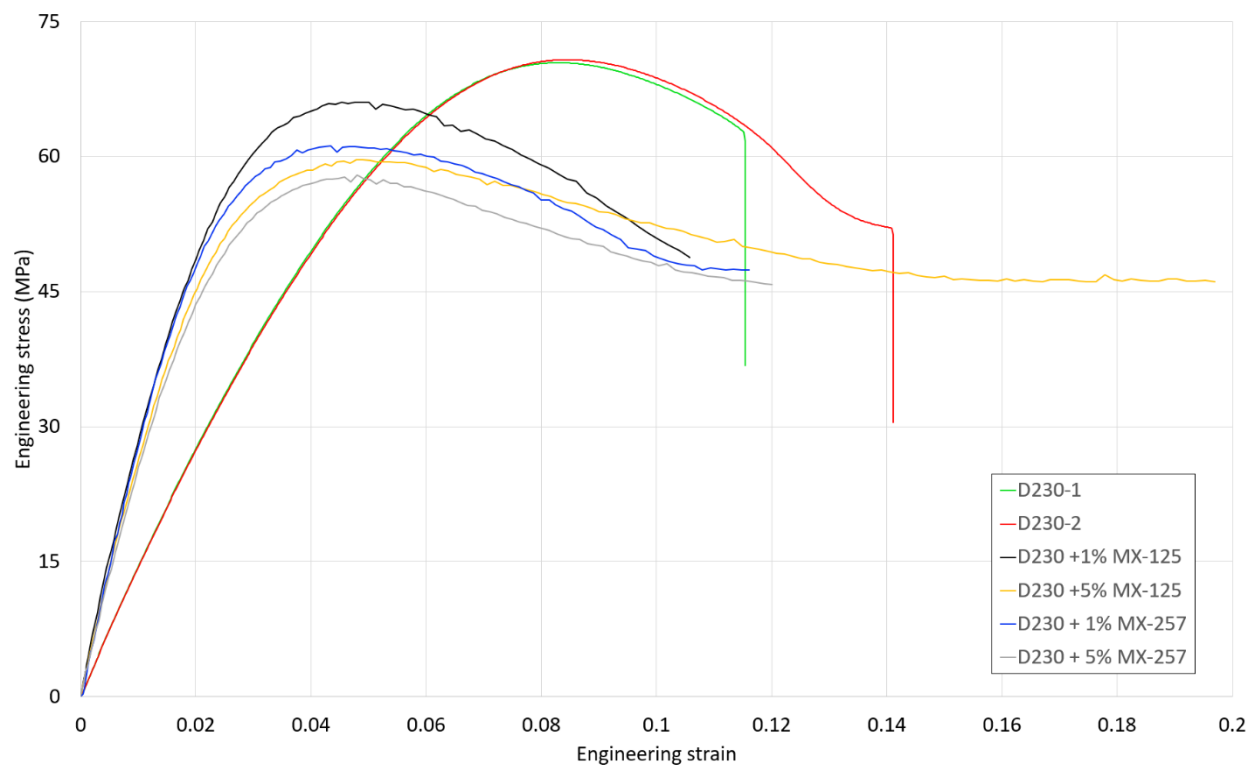

**Figure S1.** Engineering stress-strain curves measured from uniaxial tensile experiments for each material.

## Supplementary Information 2: Mesh sensitivity of XFEM simulations

XFEM predictions of  $P_{\max}$  and  $d_c$  are well-converged with respect to the mesh density as shown in Figures S2 and S3. The “Unfilled” material is a D230 resin possessing material properties and exhibiting fracture and tensile behavior like that of the D230-1 and D230-2 resins.

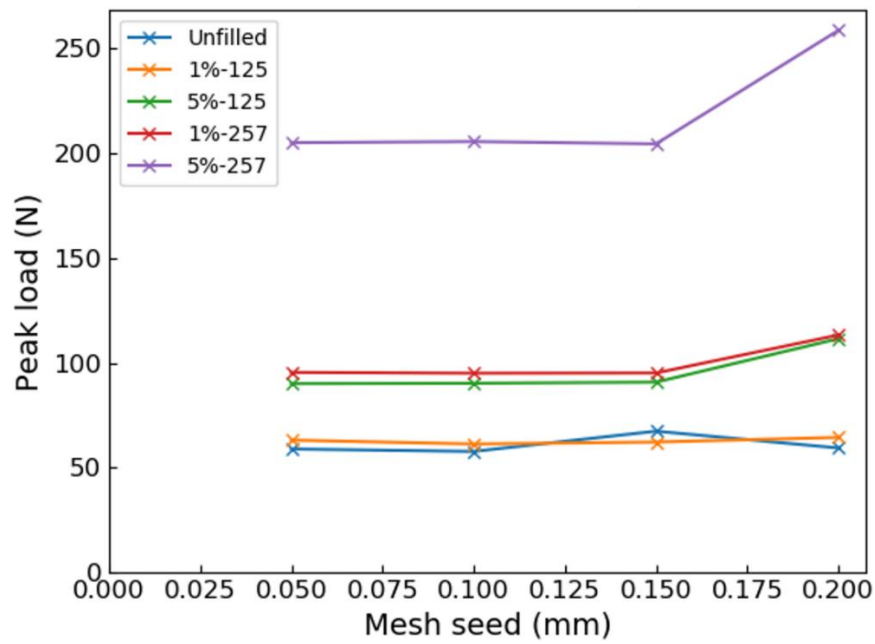

**Figure S2.** Convergence of critical load in XFEM simulations with respect to mesh size.

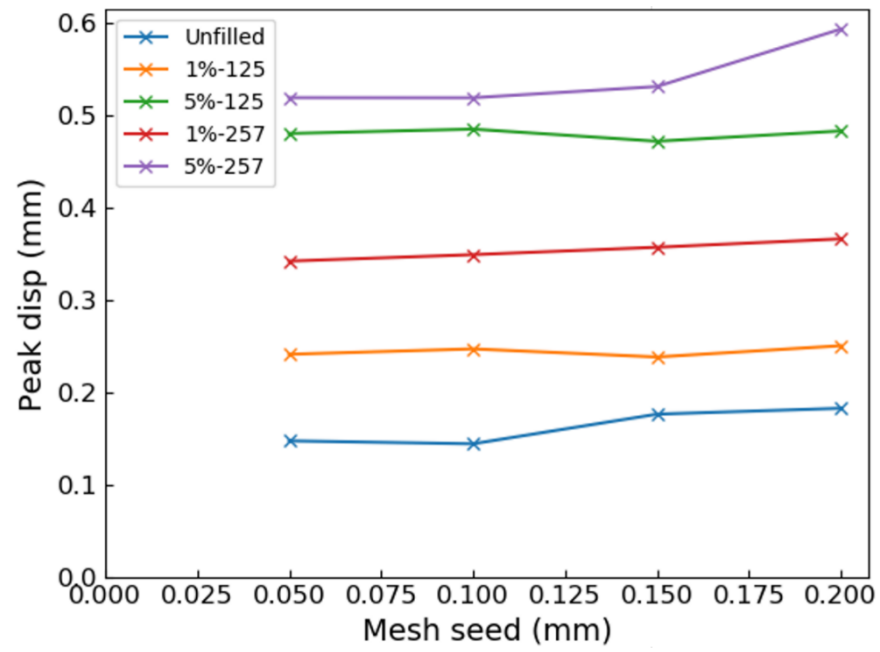

**Figure S3.** Convergence of critical load-line displacement in XFEM simulations with respect to mesh size.
